# Supplementary material for: Ensemble Learning Based on Hybrid Deep Learning Model for Heart Disease Early Prediction
Source: MDPI journal article supplement (doi:10.3390/diagnostics12123215), 2022-12-18
Supplement: s1 [file s1]

**Table S1: Features information and description of heart disease dataset1**

| SR NO. | Attribute        | Description                                                                                     | Values                                                                                     | Data Type   |
|--------|------------------|-------------------------------------------------------------------------------------------------|--------------------------------------------------------------------------------------------|-------------|
| 1      | HeartDisease     | suffering from heart disease, no heart disease                                                  | Yes - No                                                                                   | Categorical |
| 2      | BMI              | Body mass index                                                                                 | 12.02 -94.85                                                                               | Numerical   |
| 3      | Smoking          | Patient's smoking status                                                                        | Yes - No                                                                                   | Categorical |
| 4      | AlcoholDrinking  | Drinking wine(adult men: more than 14 drinks per week, adult women: more than7 drinks per week) | Yes - No                                                                                   | Categorical |
| 5      | Stroke           | suffered a stroke, no a stroke                                                                  | Yes - No                                                                                   | Categorical |
| 6      | PhysicalHealth   | How many times have you had poor physical health in the past 30 days?                           | 0-30 days                                                                                  | Numerical   |
| 7      | MentalHealth     | Number of days mental health is not good per the past 30days                                    | 0-30 days                                                                                  | Numerical   |
| 8      | DiffWalking      | Do you have serious difficulty climbing stairs or walking?                                      | Yes - No                                                                                   | Categorical |
| 9      | Sex              | Gender of patient                                                                               | Female, Male                                                                               | Categorical |
| 10     | AgeCategory      | 13-level age group                                                                              | 18-24, 25-29,30-34, 35-39,40-44,45-49, 50-54,55-59, 60-64, 65-69, 70-74, 75-79,80 or older | Categorical |
| 11     | Race             | Imputed ethnicity /race value.                                                                  | Black, Other, Asian, American Indian/Alaskan Native, White, Hispanic                       | Categorical |
| 12     | Diabetic         | Do you have diabetes or not?                                                                    | Yes - No                                                                                   | Categorical |
| 13     | PhysicalActivity | Adults who did exercise and physical activity in the past 30 days, except for their usual work. | Yes - No                                                                                   | Categorical |
| 14     | GenHealth        | Assessment of the patient's health status in general                                            | Poor, Fair, Good, Very good, Excellent                                                     | Categorical |
| 15     | SleepTime        | How many hours of sleep do you get in 24 hours?                                                 | 1-24 hour                                                                                  | Numerical   |
| 16     | Asthma           | Do you have asthma or not?                                                                      | Yes - No                                                                                   | Categorical |
| 17     | KidneyDisease    | Do you have kidney disease except kidney stones, bladder infection or incontinence?             | Yes - No                                                                                   | Categorical |
| 18     | SkinCancer       | Do you have skin cancer or not?                                                                 | Yes - No                                                                                   | Categorical |

**Table S2: Features information and description of Cleveland heart disease dataset 2016**

| S.no | Feature name                                                  | Feature | code Description                                                      | Domain of values (min-max) |
|------|---------------------------------------------------------------|---------|-----------------------------------------------------------------------|----------------------------|
| 1    | Age                                                           | AGE     | Age in years                                                          | 30 < age < 77              |
| 2    | Sex                                                           | SEX     | Male = 1<br><br>Female = 0                                            | 1<br><br>0                 |
| 3    | Type of chest pain                                            | CPT     | 1 = atypical angina<br><br>2 = typical angina<br><br>3 = asymptomatic | 1<br><br>2<br><br>3        |
| 4    | Resting blood pressure                                        | RBP     | mm Hg admitted at the hospital                                        | 94–200                     |
| 5    | Serum cholesterol                                             | SCH     | In mg/dl                                                              | 120–564                    |
| 6    | Fasting blood sugar >120 mg/dl                                | FBS     | Fasting blood sugar >120 mg/dl (1 = true; 0 = false)                  | 1<br><br>0                 |
| 7    | Resting electrocardiographic results                          | RES     | 1 = having ST-T<br><br>2 = hypertrophy                                | 1<br><br>2                 |
| 8    | Maximum heart rate achieved                                   | MHR     | -                                                                     | 71-202                     |
| 9    | Exercise-induced angina                                       | EIA     | 1 = yes<br><br>0 = no                                                 | 1<br><br>0                 |
| 10   | Old peak = ST depression induced by exercise relative to rest | OPK     | -                                                                     | 0–6.2                      |
| 11   | Slope of the peak exercise ST segment                         | PES     | 1 = up sloping<br><br>2 = flat 2                                      | 1<br><br>2                 |

|    |                                                      |     |                                                                 |                     |
|----|------------------------------------------------------|-----|-----------------------------------------------------------------|---------------------|
|    |                                                      |     | 3 = down sloping                                                | 3                   |
| 12 | Number of major vessels (0–3) colored by fluoroscopy | VCA | -                                                               | 1<br>2<br>3         |
| 13 | Thallium scan                                        | THA | 3 = normal<br><br>6 = fixed defect<br><br>7 = reversible defect | 3<br><br>6<br><br>7 |
